# Supplementary material
Source: publisher site journal article supplement (https://www.spandidos-publications.com/1599/downloadSupplementary)

Figure S1. Effect of 3-MA on autophagy protein expression. Protein expression levels of Atg7, Beclin1 and LC3-II/I in osteoclasts infected with *M.tb*, treated with TNF- $\alpha$ , and untreated or treated with 3-MA. *M.tb* H37Rv $\Delta$ eis, inhibition of autophagy gene knockout type *M.tb* H37Rv; *M.tb* H37Rv wild type *M.tb* H37Rv; TNF- $\alpha$ , tumor necrosis factor- $\alpha$ ; Atg7, autophagy-related protein 7; 3-MA, 3-methyladenine; LC-3, microtubule-associated proteins 1A/1B light chain 3A; *M.tb*, *Mycobacterium tuberculosis*.

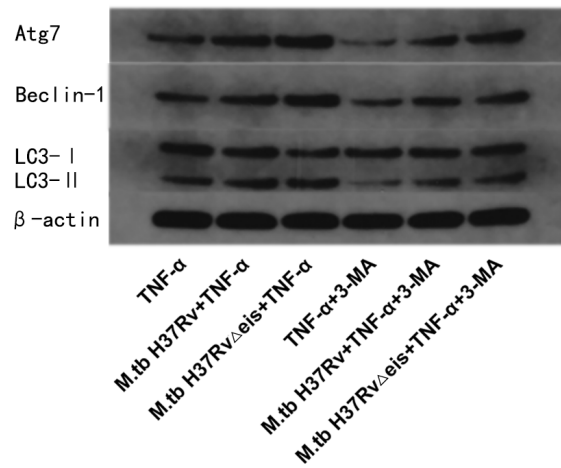

Supplement: Supplementary file 1 [file downloadSupplementary]
